# Supplementary material
Source: PubMed Central journal article supplement (PMC9154732)

# THE LANCET

## Respiratory Medicine

### Supplementary appendix

This appendix formed part of the original submission. We post it as supplied by the authors.

Supplement to: Luo J, Pavlov I, Tavernier E, et al. Rethinking the efficacy of awake prone positioning in COVID-19-related acute hypoxaemic respiratory failure—Authors' reply. *Lancet Respir Med* 2022; **10**: e54.

Figure 1. Secondary outcomes for included RCTs after exclusion of cluster-RCTs

A. Need for escalation of respiratory support

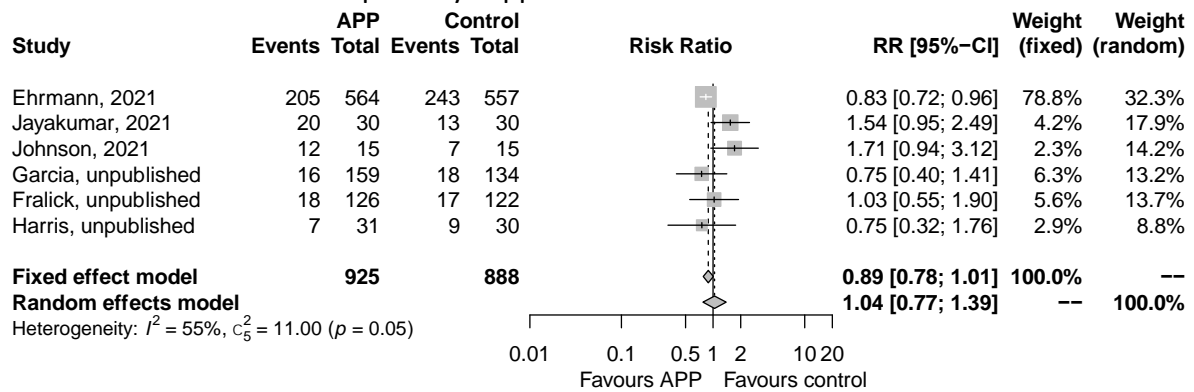

B. Need for ICU admission

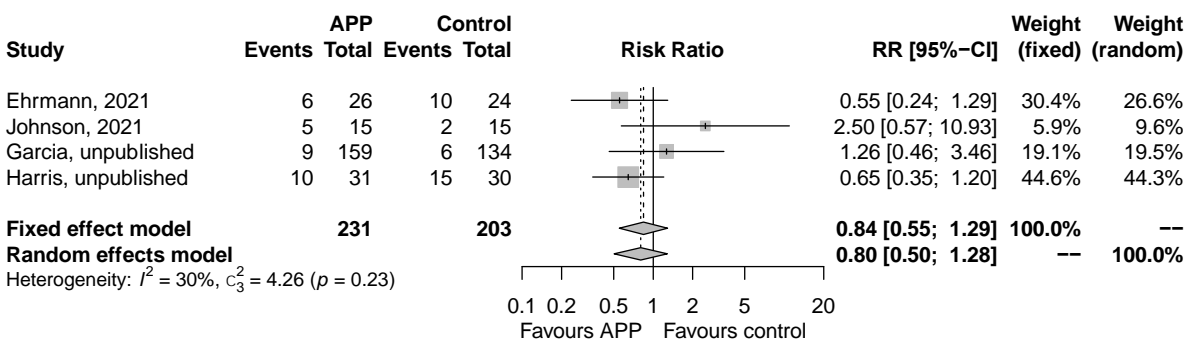

C. Hospital length of stay

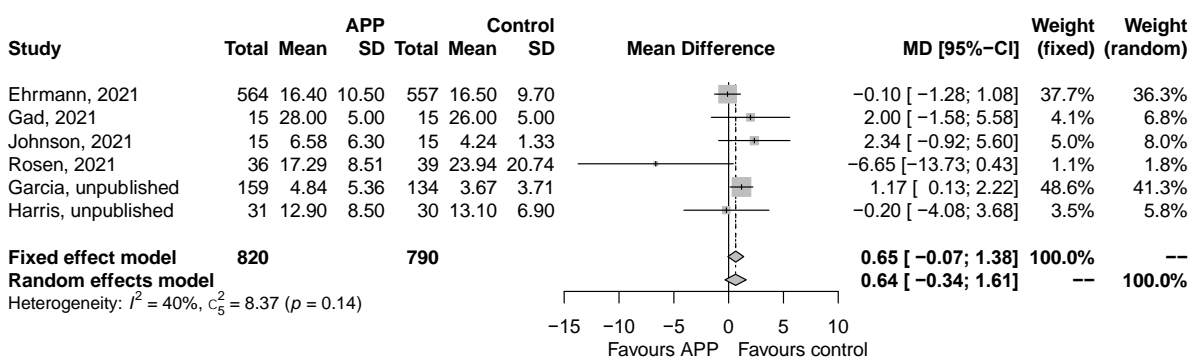

Figure 2. Subgroup analysis of need for escalation of respiratory support for included RCTs after exclusion of cluster-RCTs

A. Need for escalation of respiratory support (Advanced vs. Conventional respiratory support)

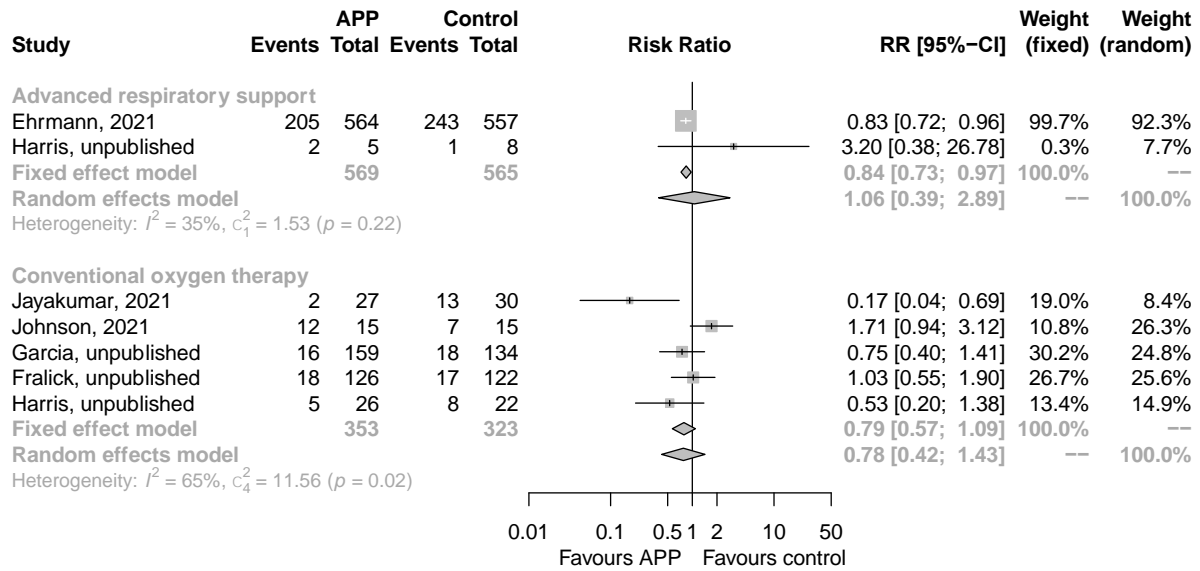

B. Need for escalation of respiratory support (ICU vs. Non-ICU)

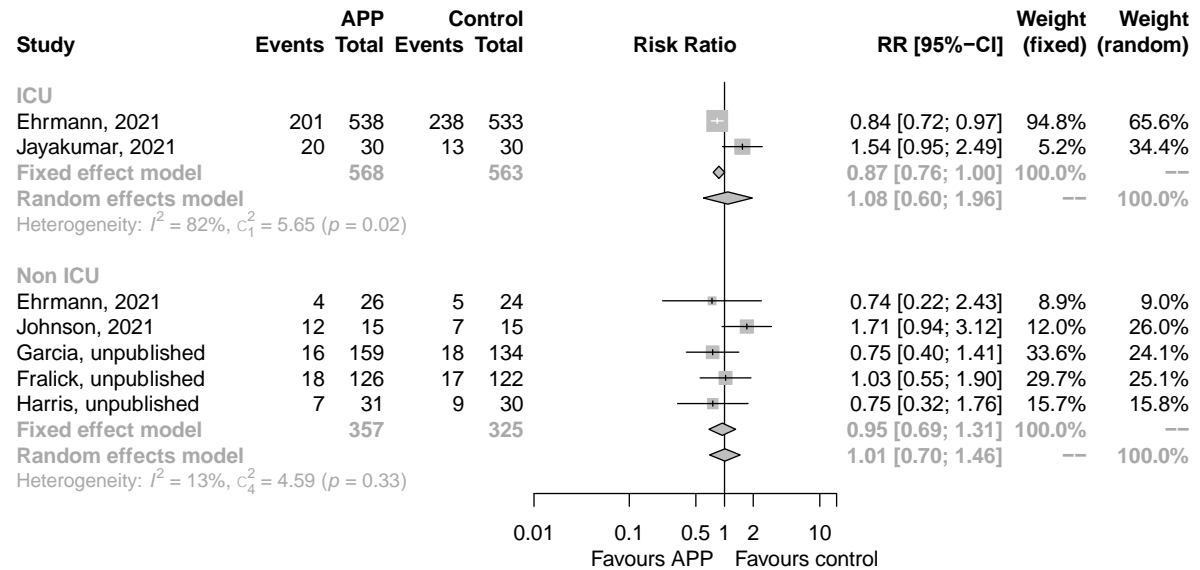

Figure 3. Subgroup analysis of need for ICU admission for included RCTs after exclusion of cluster-RCTs

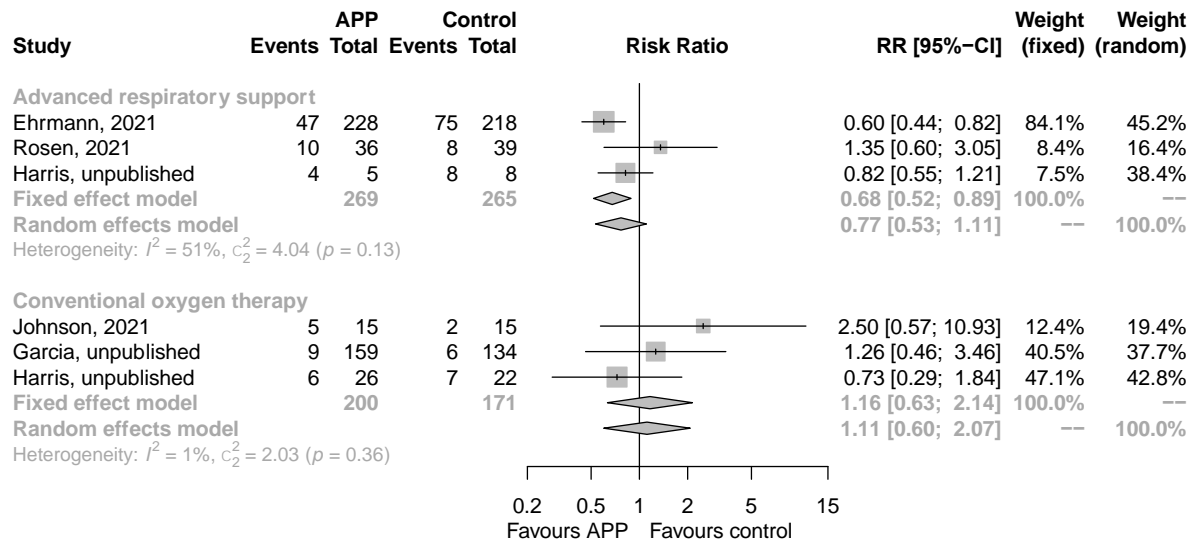

Figure 4. Subgroup analysis of hospital length of stay for included RCTs after exclusion of cluster-RCTs

A. Hospital length of stay (Advanced vs. Conventional respiratory support)

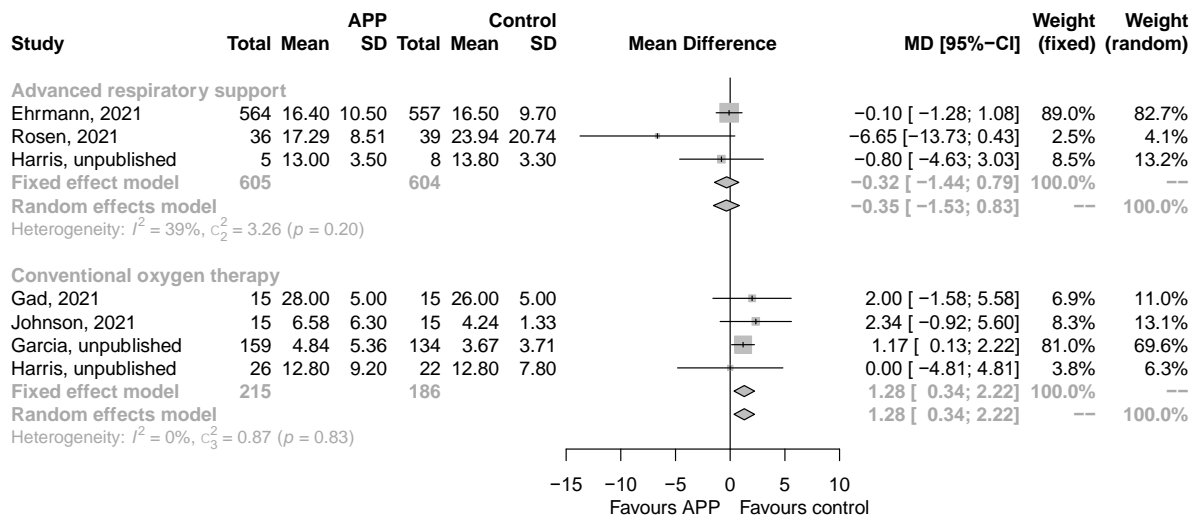

B. Hospital length of stay (ICU vs. Non-ICU)

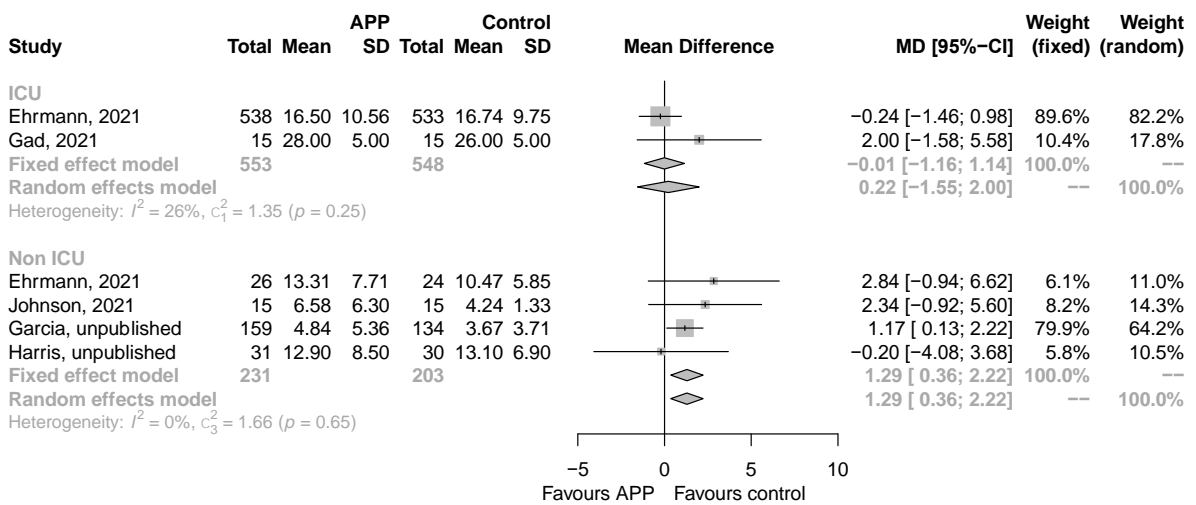

Supplement: mmc1.pdf [file mmc1.pdf]
